# Supplementary material
Source: publisher site journal article supplement (http://www.spandidos-publications.com/6085/downloadSupplementary)
Supplement: Supplementary file 1 [file downloadSupplementary]

## Sheet: Supplementary Table2
Table SII. List of analyzed genes (Axen™ Cancer Panel 2).
SNVs/InDels (170 genes)			Fusions (25 genes)
ABL1, ABL2, AKT1, AKT2, AKT3, ALK, APC, AR, ARAF, ASXL1, ATM, ATR, AURKA, AURKB, AURKC, AXL, BAP1, BCL2, BRAF, BRCA1, BRCA2, BRD2, BRD3, BRD4, CBFB, CCND1, CCND2, CCND3, CCNE1, CDH1, CDK12, CDK4, CDK6, CDKN1A, CDKN1B, CDKN2A, CDKN2B, CDKN2C, CEBPA, CHEK2, CREBBP, CRKL, CSF1R, CTNNB1, DDR1, DDR2, DNMT3A, DOT1L, EGFR, EPHA3, ERBB2, ERBB3, ERBB4, ERCC2, ERG, ERRFI1, ESR1, ETV1, ETV4, ETV5, ETV6, EWS…			ABL1, AKT3, ALK, BCL2, BRAF, EGFR, ERG, ETV1, EWSR1, FGFR1, FGFR2, FGFR3, JAK2, KMT2A, MYC, NPM1, NTRK1, PDGFRA, PDGFRB, PPARG, RAF1, RARA, RET, ROS1, TMPRSS2
InDels, insertion-deletions; SNVs, single nucleotide variants.
